# Supplementary material
Source: publisher figshare collection journal article supplement (https://karger.figshare.com/articles/dataset/_/5127760)
Supplement: Supplementary file 1 [file 1]

**Supplementary Table S2: Transmission of sexlinked microsatellites C201, C223, D214 of all green toad families**

Colour codes:

Filled cells = unequivocal assignment (light blue = paternal Y chromosome, dark blue = paternal X chromosome, light pink = maternal X1 chromosome, dark pink = maternal X2 chromosome)

Coloured numbers in white cells = Not unequivocally assignable but attributable due to allele combinations resulting from inheritance patterns (colours as above)

Black numbers in white cells = Assignment impossible due to homomorphic parental alleles

nd = not determined

| Species          | Family       | Sex-linked markers |             |                 |        |        |        |     |                |            |     |                |
|------------------|--------------|--------------------|-------------|-----------------|--------|--------|--------|-----|----------------|------------|-----|----------------|
|                  |              | C201_1             | C201_2      | C223_1          | C223_2 | D214_1 | D214_2 |     |                |            |     |                |
| B. balearicus    | Bufo810xMBal | Mother Bufo810     | 106         | 106             | 168    | 176    | 260    | 264 | Phenotypic sex |            |     |                |
|                  |              | Father unknown     | 98          | 110             | 196    | 168    | 260    | 260 |                |            |     |                |
|                  |              | Bufo810xMBal_1     | 110         | 106             | 168    | 176    | 260    | 264 |                | unsexed    |     |                |
|                  |              | Bufo810xMBal_6     | 110         | 106             | 168    | 168    | 260    | 260 |                | unsexed    |     |                |
|                  |              | Bufo810xMBal_12    | 110         | 106             | 168    | 168    | 260    | 264 |                | F          |     |                |
|                  |              | Bufo810xMBal_13    | 110         | 106             | 168    | 176    | 260    | 264 |                | F          |     |                |
|                  |              | Bufo810xMBal_15    | 110         | 106             | 168    | 168    | 260    | 260 |                | F          |     |                |
|                  |              | Bufo810xMBal_17    | 110         | 106             | 168    | 176    | 260    | 264 |                | F          |     |                |
|                  |              | Bufo810xMBal_2     | 98          | 106             | 196    | 168    | 260    | 260 |                | unsexed    |     |                |
|                  |              | Bufo810xMBal_3     | 98          | 106             | 196    | 168    | 260    | 260 |                | M          |     |                |
|                  |              | Bufo810xMBal_4     | 98          | 106             | 196    | 168    | 260    | 260 |                | M          |     |                |
|                  |              | Bufo810xMBal_5     | 98          | 106             | 196    | 168    | 260    | 260 |                | M          |     |                |
|                  |              | Bufo810xMBal_7     | 98          | 106             | 196    | 168    | 260    | 260 |                | M          |     |                |
|                  |              | Bufo810xMBal_8     | 98          | 106             | 196    | 176    | 260    | 264 |                | M          |     |                |
|                  |              | Bufo810xMBal_9     | 98          | 106             | 196    | 176    | 260    | 264 |                | M          |     |                |
|                  |              | Bufo810xMBal_10    | 98          | 106             | 196    | 168    | 260    | 260 |                | M          |     |                |
|                  |              | Bufo810xMBal_11    | 98          | 106             | 196    | 176    | 260    | 260 |                | M          |     |                |
|                  |              | Bufo810xMBal_14    | 98          | 106             | 196    | 176    | 260    | 264 |                | M          |     |                |
|                  |              | Bufo810xMBal_16    | 98          | 106             | 196    | 168    | 260    | 260 |                | M          |     |                |
|                  |              | Bufo810xMBal_18    | 98          | 106             | 196    | 168    | 260    | 260 |                | M          |     |                |
|                  |              | Bufo810xMBal_19    | 98          | 106             | 196    | 168    | 260    | 264 |                | M          |     |                |
| B. viridis       | GR93x94      | Mother GR93        | 98          | 110             | 168    | 172    | 264    | 268 | Phenotypic sex |            |     |                |
|                  |              | Father GR94        | 110         | 106             | 172    | 172    | 256    | 264 |                |            |     |                |
|                  |              | GR93x94_21         | 106         | 110             | 172    | 168    | 264    | 268 |                | F          |     |                |
|                  |              | GR93x94_23         | 106         | 110             | 172    | 172    | 264    | 268 |                | F          |     |                |
|                  |              | GR93x94_25         | 106         | 110             | 172    | 172    | 264    | 268 |                | unsexed    |     |                |
|                  |              | GR93x94_31         | 106         | 98              | 172    | 168    | 264    | 268 |                | F          |     |                |
|                  |              | GR93x94_33         | 106         | 110             | 172    | 172    | 264    | 268 |                | F          |     |                |
|                  |              | GR93x94_24         | 110         | 98              | 172    | 172    | 256    | 264 |                | M          |     |                |
|                  |              | GR93x94_27         | 110         | 98              | 172    | 168    | 256    | 268 |                | M          |     |                |
|                  |              | GR93x94_29         | 110         | 98              | 172    | 168    | 256    | 268 |                | M          |     |                |
|                  |              | GR93x94_30         | 110         | 98              | 172    | 172    | 256    | 268 |                | M          |     |                |
|                  |              | GR93x94_32         | 110         | 98              | 172    | 172    | 256    | 264 |                | M          |     |                |
| B. viridis       | GR95x96      | Mother GR95        | 102         | 118             | 168    | 168    | 256    | 260 | Phenotypic sex |            |     |                |
|                  |              | Father GR96        | 114         | 102             | 168    | 168    | 260    | 260 |                |            |     |                |
|                  |              | GR95x96_22         | 102         | 118             | 168    | 168    | nd     | nd  |                | F          |     |                |
|                  |              | GR95x96_24         | 102         | 118             | 168    | 168    | 260    | 260 |                | F          |     |                |
|                  |              | GR95x96_25         | 102         | 118             | 168    | 168    | 260    | 256 |                | F          |     |                |
|                  |              | GR95x96_27         | 102         | 118             | 168    | 168    | 260    | 256 |                | F          |     |                |
|                  |              | GR95x96_29         | nd          | nd              | 168    | 168    | 260    | 260 |                | F          |     |                |
|                  |              | GR95x96_30         | 102         | 118             | 168    | 168    | 260    | 256 |                | F          |     |                |
|                  |              | GR95x96_21         | 114         | 118             | 168    | 168    | 260    | 256 |                | M          |     |                |
|                  |              | GR95x96_23         | 114         | 102             | 168    | 168    | 260    | 256 |                | M          |     |                |
|                  |              | GR95x96_26         | 114         | 102             | 168    | 168    | 260    | 256 |                | M          |     |                |
|                  |              | GR95x96_28         | 114         | 102             | 168    | 168    | 260    | 260 |                | M          |     |                |
| B. viridis       | GRI          | Mother unknown     | 94          | 110             | 168    | 172    | 256    | 272 | Phenotypic sex |            |     |                |
|                  |              | Father unknown     | 94          | 110             | 172    | 172    | 260    | 260 |                |            |     |                |
|                  |              | GRI_21             | 110         | 94              | 172    | 172    | 260    | 256 |                | recombined |     |                |
|                  |              | GRI_22             | 94          | 94              | 172    | 172    | 260    | 256 |                | F          |     |                |
|                  |              | GRI_24             | 110         | 94              | 172    | 172    | 260    | 272 |                | F          |     |                |
|                  |              | GRI_25             | 94          | 110             | 172    | 172    | 260    | 256 |                | M          |     |                |
|                  |              | GRI_26             | 94          | 110             | 172    | 168    | 260    | 256 |                | M          |     |                |
|                  |              | GRI_28             | 94          | 94              | 172    | 168    | 260    | 272 |                | M          |     |                |
|                  |              | GRI_29             | 94          | 94              | 172    | 168    | 260    | 272 |                | M          |     |                |
|                  |              | B. viridis         | GR13_11x12  | Mother GR13_11  | 110    | 114    | 172    | 172 |                | 261        | 269 | Phenotypic sex |
|                  |              |                    |             | Father GR13_12  | 110    | 114    | 172    | 172 |                | 269        | 269 |                |
|                  |              |                    |             | GR13_11x12_19.4 | 114    | 110    | 172    | 172 |                | 269        | 269 |                |
| GR13_11x12_19.5  | 114          |                    |             | 114             | 172    | 172    | 269    | 261 | F              |            |     |                |
| GR13_11x12_19.7  | 110          |                    |             | 110             | 172    | 172    | 269    | 261 | F              |            |     |                |
| GR13_11x12_19.8  | 114          |                    |             | 110             | 172    | 172    | 269    | 269 | F              |            |     |                |
| GR13_11x12_19.9  | 114          |                    |             | 114             | 172    | 172    | 269    | 261 | F              |            |     |                |
| GR13_11x12_19.11 | 114          |                    |             | 114             | 172    | 172    | 269    | 261 | F              |            |     |                |
| GR13_11x12_19.12 | 114          |                    |             | 114             | 172    | 172    | 269    | 269 | F              |            |     |                |
| GR13_11x12_19.13 | 114          |                    |             | 114             | 172    | 172    | 269    | 261 | F              |            |     |                |
| GR13_11x12_19.16 | 114          |                    |             | 110             | 172    | 172    | 269    | 261 | F              |            |     |                |
| GR13_11x12_19.18 | 114          |                    |             | 114             | 172    | 172    | 269    | 261 | F              |            |     |                |
| GR13_11x12_19.1  | 114          |                    |             | 114             | 172    | 172    | 269    | 269 | unsexed        |            |     |                |
| GR13_11x12_19.2  | 110          |                    |             | 110             | 172    | 172    | 269    | 269 | M              |            |     |                |
| GR13_11x12_19.3  | 110          |                    |             | 110             | 172    | 172    | 269    | 261 | M              |            |     |                |
| GR13_11x12_19.6  | 110          |                    |             | 110             | 172    | 172    | 269    | 269 | M              |            |     |                |
| GR13_11x12_19.10 | 110          |                    |             | 110             | 172    | 172    | 269    | 269 | M              |            |     |                |
| GR13_11x12_19.14 | 110          |                    |             | 110             | 172    | 172    | 269    | 261 | M              |            |     |                |
| GR13_11x12_19.15 | 110          |                    |             | 114             | 172    | 172    | 269    | 261 | M              |            |     |                |
| GR13_11x12_19.17 | 110          |                    |             | 110             | 172    | 172    | 269    | 269 | M              |            |     |                |
| GR13_11x12_19.19 | 110          |                    |             | 110             | 172    | 172    | 269    | 261 | M              |            |     |                |
| GR13_11x12_19.20 | 110          |                    |             | 114             | 172    | 172    | 269    | 269 | M              |            |     |                |
| B. viridis       | Bv Thrapsano | Mother unknown     | 110         | 122             | 172    | 184    | 265    | 269 | Phenotypic sex |            |     |                |
|                  |              | Father unknown     | 114         | 114             | 172    | 172    | 265    | 261 |                |            |     |                |
|                  |              | Bv Thrapsano_15.1  | 114         | 110             | 172    | 184    | 261    | 269 |                | F          |     |                |
|                  |              | Bv Thrapsano_15.3  | 114         | 110             | 172    | 172    | 265    | 269 |                | F          |     |                |
|                  |              | Bv Thrapsano_15.4  | 114         | 122             | 172    | 184    | 261    | 265 |                | F          |     |                |
|                  |              | Bv Thrapsano_15.6  | 114         | 122             | 172    | 184    | 261    | 265 |                | F          |     |                |
|                  |              | Bv Thrapsano_15.7  | 114         | 122             | 172    | 184    | 261    | 265 |                | F          |     |                |
|                  |              | Bv Thrapsano_15.8  | 114         | 122             | 172    | 184    | 261    | 265 |                | F          |     |                |
|                  |              | Bv Thrapsano_15.15 | 114         | 122             | 172    | 172    | nd     | 265 |                | F          |     |                |
|                  |              | Bv Thrapsano_15.5  | 114         | 110             | 172    | 172    | 265    | 269 |                | M          |     |                |
|                  |              | Bv Thrapsano_15.14 | 114         | 110             | 172    | 184    | 265    | 269 |                | M          |     |                |
|                  |              | B. variabilis      | Th1M1xTh1F1 | Mother Th1F1    | 94     | 126    | 172    | 176 |                | 272        | 265 | Phenotypic sex |
| Father Th1M1     | 98           |                    |             | 110             | 184    | 176    | 273    | 261 |                |            |     |                |
| Th1M1xTh1F1_21   | 110          |                    |             | 94              | 176    | 176    | 261    | 272 | unsexed        |            |     |                |
| Th1M1xTh1F1_22   | 110          |                    |             | 126             | 176    | 176    | 261    | 265 | F              |            |     |                |
| Th1M1xTh1F1_25   | 110          |                    |             | 126             | 176    | 172    | 261    | 265 | M              |            |     |                |
| Th1M1xTh1F1_23   | 98           |                    |             | 94              | 184    | 176    | 273    | 272 | M              |            |     |                |
| Th1M1xTh1F1_24   | 98           |                    |             | 126             | 184    | 172    | 273    | 265 | M              |            |     |                |
| Th1M1xTh1F1_26   | 98           |                    |             | 94              | 184    | 176    | 273    | 272 | unsexed        |            |     |                |
| Th1M1xTh1F1_27   | 98           |                    |             | 126             | 184    | 176    | 273    | 272 | M              |            |     |                |

|                      |             |               |     |     |     |     |     |     |                |
|----------------------|-------------|---------------|-----|-----|-----|-----|-----|-----|----------------|
| <i>B. variabilis</i> | Th1F2xTh1M2 | Mother Th1F2  | 94  | 94  | 164 | 172 | 273 | 273 | Phenotypic sex |
|                      |             | Father Th1M2  | 94  | 118 | 176 | 176 | 256 | 264 |                |
|                      |             | Th1M2xTh1F2_2 | 118 | 94  | 176 | 164 | 264 | 273 |                |
|                      |             | Th1M2xTh1F2_3 | 118 | 94  | 176 | 172 | 264 | 273 |                |
|                      |             | Th1M2xTh1F2_5 | 118 | 94  | 176 | 172 | 264 | 273 |                |
|                      |             | Th1M2xTh1F2_7 | 118 | 94  | 176 | 164 | 264 | 273 |                |
|                      |             | Th1M2xTh1F2_1 | 94  | 94  | 172 | 172 | 256 | 273 |                |
|                      |             | Th1M2xTh1F2_4 | 94  | 94  | 172 | 172 | 256 | 273 |                |
|                      |             | Th1M2xTh1F2_6 | 94  | 94  | 172 | 164 | 256 | 273 |                |

|                                                      |             |              |     |     |     |     |     |     |                |
|------------------------------------------------------|-------------|--------------|-----|-----|-----|-----|-----|-----|----------------|
| Hybrid zone <i>B. viridis</i> / <i>B. variabilis</i> | GR243xGR244 | Mother GR243 | 106 | 114 | 168 | 176 | 252 | 272 | Phenotypic sex |
|                                                      |             | Father GR244 | 106 | 98  | 172 | 164 | 264 | 264 |                |
|                                                      |             | GR243x244_22 | 98  | 106 | 164 | 176 | 264 | 252 |                |
|                                                      |             | GR243x244_24 | 98  | 106 | 164 | 176 | 264 | 252 |                |
|                                                      |             | GR243x244_25 | 98  | 114 | 164 | 176 | 264 | 252 |                |
|                                                      |             | GR243x244_30 | 98  | 106 | 164 | 176 | 264 | 252 |                |
|                                                      |             | GR243x244_31 | 98  | 114 | 164 | 176 | 264 | 252 |                |
|                                                      |             | GR243x244_21 | 98  | 106 | 164 | 176 | 264 | 252 |                |
|                                                      |             | GR243x244_23 | 106 | 114 | 172 | 168 | 264 | 252 |                |
|                                                      |             | GR243x244_26 | 106 | 106 | 172 | 168 | 264 | 272 |                |
|                                                      |             | GR243x244_27 | 106 | 114 | 172 | 168 | 264 | 272 |                |
|                                                      |             | GR243x244_29 | 106 | 106 | 172 | 168 | 264 | 252 |                |

|                                                      |             |                |     |     |     |     |     |     |                |
|------------------------------------------------------|-------------|----------------|-----|-----|-----|-----|-----|-----|----------------|
| Hybrid zone <i>B. viridis</i> / <i>B. variabilis</i> | Clutch GRII | Mother unknown | 94  | 110 | 172 | 176 | 264 | 276 | Phenotypic sex |
|                                                      |             | Father unknown | 94  | 110 | 164 | 176 | 252 | 268 |                |
|                                                      |             | GRII_25        | 110 | 94  | 176 | 176 | 264 | 264 |                |
|                                                      |             | GRII_22        | 94  | 94  | 164 | 172 | 252 | 276 |                |
|                                                      |             | GRII_23        | 94  | 94  | 164 | 176 | 252 | 276 |                |
|                                                      |             | GRII_24        | 94  | 110 | 164 | 172 | 252 | 264 |                |
|                                                      |             | GRII_26        | 94  | 110 | 164 | 172 | 252 | 264 |                |

|                                                      |              |                |     |     |     |     |     |     |                |
|------------------------------------------------------|--------------|----------------|-----|-----|-----|-----|-----|-----|----------------|
| Hybrid zone <i>B. viridis</i> / <i>B. variabilis</i> | Clutch GRIII | Mother unknown | 118 | 102 | 168 | 172 | 256 | 260 | Phenotypic sex |
|                                                      |              | Father unknown | 98  | 114 | 176 | 176 | 264 | 252 |                |
|                                                      |              | GRIII_21       | 114 | 102 | 176 | 172 | 252 | 260 |                |
|                                                      |              | GRIII_22       | 114 | 102 | 176 | 172 | 252 | 260 |                |
|                                                      |              | GRIII_24       | 114 | 118 | 176 | 172 | 252 | 260 |                |
|                                                      |              | GRIII_26       | 114 | 102 | 176 | 172 | 252 | 260 |                |
|                                                      |              | GRIII_23       | 98  | 118 | 176 | 172 | 264 | 260 |                |
|                                                      |              | GRIII_25       | 98  | 118 | 176 | 172 | 264 | 260 |                |
|                                                      |              | GRIII_27       | 98  | 118 | 176 | 172 | 264 | 256 |                |
|                                                      |              | GRIII_28       | 98  | 102 | 176 | 168 | 264 | 256 |                |
|                                                      |              | GRIII_29       | 98  | 118 | 176 | 168 | 264 | 256 |                |

|                                                      |             |                |     |     |     |     |     |     |                |
|------------------------------------------------------|-------------|----------------|-----|-----|-----|-----|-----|-----|----------------|
| Hybrid zone <i>B. viridis</i> / <i>B. variabilis</i> | Clutch GRIV | Mother unknown | 94  | 114 | 172 | 172 | 256 | 260 | Phenotypic sex |
|                                                      |             | Father unknown | 98  | 110 | 176 | 168 | 268 | 264 |                |
|                                                      |             | GRIV_23        | 110 | 114 | 168 | 172 | 264 | 256 |                |
|                                                      |             | GRIV_24        | 110 | 94  | 168 | 172 | 264 | 256 |                |
|                                                      |             | GRIV_27        | 110 | 94  | 168 | 172 | 268 | 260 |                |
|                                                      |             | GRIV_26        | 98  | 114 | 176 | 172 | 268 | 260 |                |
|                                                      |             | GRIV_28        | 98  | 94  | 176 | 172 | 268 | 260 |                |

|                                                      |            |                |     |     |     |     |     |     |                |
|------------------------------------------------------|------------|----------------|-----|-----|-----|-----|-----|-----|----------------|
| Hybrid zone <i>B. viridis</i> / <i>B. variabilis</i> | Clutch GRV | Mother unknown | 114 | 118 | 172 | 176 | 264 | 268 | Phenotypic sex |
|                                                      |            | Father unknown | 98  | nd  | 168 | nd  | 260 | nd  |                |
|                                                      |            | GRV_21         | 98  | 118 | 168 | 172 | 260 | 264 |                |
|                                                      |            | GRV_22         | 98  | 118 | 168 | 176 | 260 | 268 |                |
|                                                      |            | GRV_23         | 98  | 114 | 168 | 172 | 260 | 264 |                |
|                                                      |            | GRV_24         | 98  | 118 | 168 | 176 | 260 | 268 |                |
|                                                      |            | GRV_25         | 98  | 114 | 168 | 176 | 260 | 268 |                |
|                                                      |            | GRV_26         | 98  | 118 | 168 | 176 | 260 | 268 |                |

|                                                      |             |                |     |     |     |     |     |     |                |
|------------------------------------------------------|-------------|----------------|-----|-----|-----|-----|-----|-----|----------------|
| Hybrid zone <i>B. viridis</i> / <i>B. variabilis</i> | Clutch GRVI | Mother unknown | 114 | nd  | nd  | 176 | 256 | 267 | Phenotypic sex |
|                                                      |             | Father unknown | 94  | nd  | 172 | nd  | 263 | nd  |                |
|                                                      |             | GRVI_21        | 94  | 114 | 172 | 176 | 263 | 256 |                |
|                                                      |             | GRVI_24        | 94  | 114 | 172 | 176 | 263 | 267 |                |
|                                                      |             | GRVI_25        | 94  | 114 | 172 | 176 | 263 | 267 |                |
|                                                      |             | GRVI_26        | 94  | 114 | 172 | 176 | 263 | 267 |                |

|                                                      |              |                |    |     |     |     |     |     |                |
|------------------------------------------------------|--------------|----------------|----|-----|-----|-----|-----|-----|----------------|
| Hybrid zone <i>B. viridis</i> / <i>B. variabilis</i> | Clutch GRVII | Mother unknown | 98 | 118 | 180 | 176 | 260 | 263 | Phenotypic sex |
|                                                      |              | Father unknown | 94 | 94  | 172 | 164 | 267 | 260 |                |
|                                                      |              | GRVII_21       | 94 | 98  | 164 | 180 | 260 | 263 |                |
|                                                      |              | GRVII_23       | 94 | 118 | 164 | 180 | 260 | 263 |                |
|                                                      |              | GRVII_24       | 94 | 98  | 164 | 180 | 260 | 263 |                |
|                                                      |              | GRVII_25       | 94 | 118 | 164 | 180 | 260 | 256 |                |
|                                                      |              | GRVII_26       | 94 | 118 | 164 | 180 | 260 | 263 |                |
|                                                      |              | GRVII_27       | 94 | 118 | 164 | 180 | 260 | 263 |                |
|                                                      |              | GRVII_22       | 94 | 98  | 172 | 176 | 267 | 260 |                |

|                                                      |               |                |     |     |     |     |     |     |                |
|------------------------------------------------------|---------------|----------------|-----|-----|-----|-----|-----|-----|----------------|
| Hybrid zone <i>B. viridis</i> / <i>B. variabilis</i> | Clutch GRVIII | Mother unknown | 106 | 110 | 168 | 200 | 256 | 264 | Phenotypic sex |
|                                                      |               | Father unknown | 110 | 118 | 176 | 176 | 256 | 264 |                |
|                                                      |               | GRVIII_22      | 118 | 106 | 176 | 200 | 264 | 256 |                |
|                                                      |               | GRVIII_23      | 118 | 106 | 176 | 200 | 264 | 256 |                |
|                                                      |               | GRVIII_25      | 118 | 110 | 176 | 200 | 264 | 256 |                |
|                                                      |               | GRVIII_26      | 118 | 110 | 176 | 200 | 264 | 256 |                |
|                                                      |               | GRVIII_27      | 118 | 106 | 176 | 200 | 264 | 264 |                |
|                                                      |               | GRVIII_30      | 118 | 110 | 176 | 200 | 264 | 264 |                |
|                                                      |               | GRVIII_33      | 118 | 110 | 176 | 200 | 264 | 264 |                |
|                                                      |               | GRVIII_34      | 118 | 110 | 176 | 200 | 264 | 264 |                |
|                                                      |               | GRVIII_37      | 118 | 106 | 176 | 200 | 264 | 256 |                |
|                                                      |               | GRVIII_39      | 118 | 106 | 176 | 200 | 264 | 264 |                |
|                                                      |               | GRVIII_40      | 118 | 106 | 176 | 200 | 264 | 256 |                |
|                                                      |               | GRVIII_31      | 110 | 106 | 176 | 168 | 256 | 264 |                |
|                                                      |               | GRVIII_21      | 110 | 106 | 176 | 168 | 256 | 256 |                |
|                                                      |               | GRVIII_24      | 110 | 106 | 176 | 168 | 256 | 264 |                |
|                                                      |               | GRVIII_28      | 110 | 106 | 176 | 168 | 256 | 264 |                |
|                                                      |               | GRVIII_29      | 110 | 110 | 176 | 168 | 256 | 264 |                |
|                                                      |               | GRVIII_32      | 110 | 106 | 176 | 168 | 256 | 256 |                |
|                                                      |               | GRVIII_35      | 110 | 106 | 176 | 168 | 256 | 256 |                |
|                                                      |               | GRVIII_36      | 110 | 106 | 176 | 168 | 256 | 256 |                |
