# Supplementary material
Source: publisher figshare collection journal article supplement (https://karger.figshare.com/articles/dataset/_/5127760)

## Supplementary Information S3:

### Linkage maps for sex-linked markers D214, C201 and C223.

Differences in recombination rates and thus map length between female and male *B. viridis*, *B. variabilis*, *B. balearicus* and individuals from a hybrid zone of *B. viridis* and *B. variabilis*. Lengths are given in cM.

#### *B. viridis*

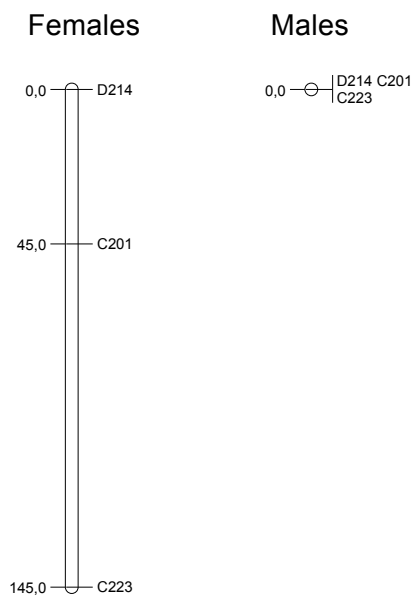

#### *B. variabilis*

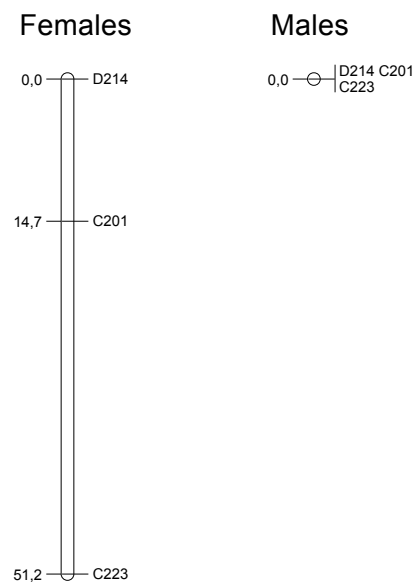

#### *B. balearicus*

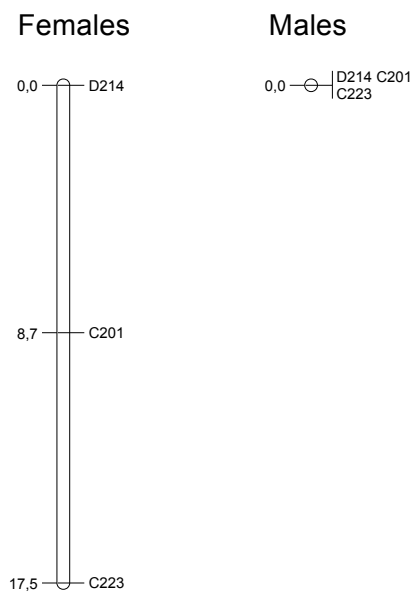

#### Hybrid zone *B. viridis*/*B. variabilis*

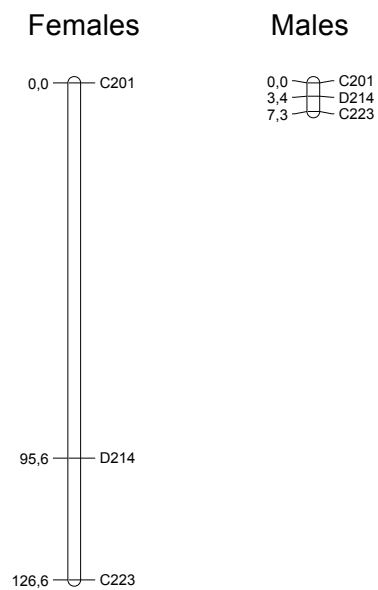

Supplement: Supplementary file 2 [file 1]
