# Supplementary material
Source: publisher figshare collection journal article supplement (https://karger.figshare.com/articles/dataset/_/5127760)
Supplement: Supplementary file 3 [file 1]

Archive with 3 entries (3 files):
- 000380841_sm_Suppl._Information_1.pdf
- 000380841_sm_Suppl._Information_2.pdf
- 000380841_sm_Suppl._Information_3.pdf
