# Supplementary material
Source: publisher figshare collection journal article supplement (https://karger.figshare.com/articles/dataset/_/5127760)
Supplement: Supplementary file 3 [file 1 › 000380841_sm_Suppl._Information_1.pdf]

## Supplementary Information 1

Population genetics analyses, using 12 autosomal microsatellites; bar plots from the Bayesian program STRUCTURE (Pritchard et al. 2000) under  $K = 2$ .

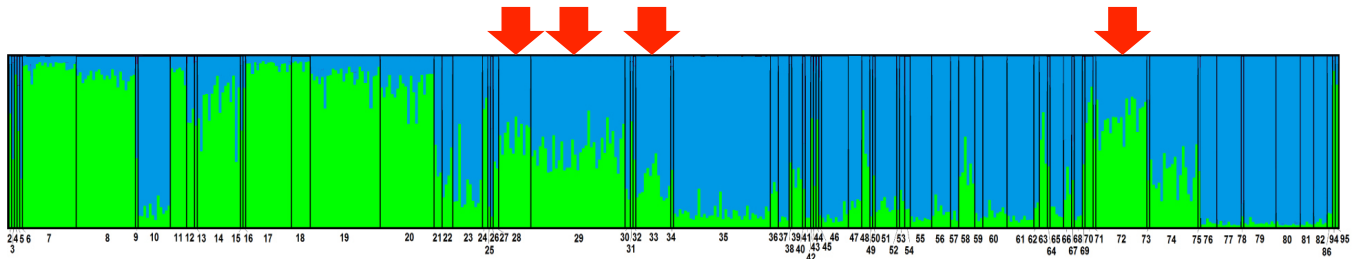

**Above:** Secondary contact of *Bufo viridis* (green) and *B. variabilis* (blue) on the Balkan Peninsula (our still unpublished data); arrows show the populations from which genetic families from the hybrid zone were obtained.

**Below:** Secondary contact of *Bufo viridis* (red) and *B. balearicus* (green) on the Po Plain; arrows shows the population from which the genetic family of *B. balearicus* was obtained (most data from Dufresnes et al. 2014).

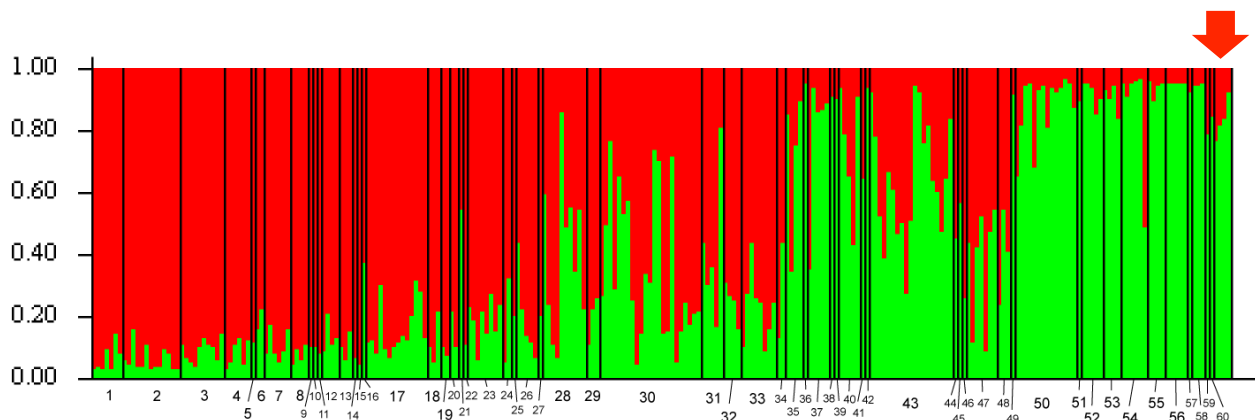

### References:

Dufresnes C, Bonato L, Novarini N, Betto-Colliard C, Perrin N, Stöck M: Inferring the degree of incipient speciation in secondary contact zones of closely related lineages of Palearctic green toads (*Bufo viridis* subgroup). *Heredity* 113: 9–20 (2014).

Pritchard JK, Stephens M, Donnelly P: Inference of population structure using multilocus genotype data. *Genetics* 155: 945–959 (2000).
